# Supplementary material for: Bacteriobiota of the Cave Church of Sts. Peter and Paul in Serbia—Culturable and Non-Culturable Communities’ Assessment in the Bioconservation Potential of a Peculiar Fresco Painting
Source: MDPI journal article supplement (doi:10.3390/ijms24021016), 2023-01-05
Supplement: s1 [file s1]

# SUPPLEMENTARY MATERIAL

*Article*

## **Bacteriobiota of the Cave Church of Sts. Peter and Paul in Serbia – culturable and non-culturable communities' assessment in the bioconservation potential of a peculiar fresco painting**

**Ivica Dimkić<sup>1</sup>, Milica Ćopić<sup>1</sup>, Marija Petrović<sup>1</sup>, Miloš Stupar<sup>1</sup>, Željko Savković<sup>1</sup>, Aleksandar Knežević<sup>1</sup>, Gordana Subakov Simić<sup>1</sup>, Milica Ljaljević Grbić<sup>1</sup>, and Nikola Unković<sup>1,\*</sup>**

<sup>1</sup> University of Belgrade – Faculty of Biology, Studentski trg 16, 11 000 Belgrade, Serbia

\*Correspondence: [unkovicn@bio.bg.ac.rs](mailto:unkovicn@bio.bg.ac.rs); Tel.: +381 11 3244 847

**Table S1:** Number of the read retention and sequence decontamination.

| Sample  | Input  | Primer<br>remove | Quality<br>filter | Denoised<br>F | Denoised<br>R | Merged | Chimera<br>remove | Length<br>trim | Decontaminated<br>reads | Percent<br>retained | Final %<br>of reads |
|---------|--------|------------------|-------------------|---------------|---------------|--------|-------------------|----------------|-------------------------|---------------------|---------------------|
| 01      | 223434 | 223273           | 168088            | 166348        | 166780        | 161680 | 157149            | 157081         | 156829                  | 99.84               | 70.30               |
| 02      | 154666 | 154512           | 116104            | 114690        | 115138        | 111196 | 108664            | 108562         | 108332                  | 99.79               | 70.19               |
| 03      | 182100 | 181849           | 134976            | 133872        | 134152        | 130475 | 126900            | 126861         | 126159                  | 99.45               | 69.67               |
| 04-05   | 167557 | 167294           | 125791            | 123930        | 124634        | 120416 | 117894            | 117732         | 117545                  | 99.84               | 70.26               |
| 06      | 94529  | 84983            | 61253             | 59735         | 59777         | 54033  | 53659             | 50099          | 50099                   | 100                 | 53.00               |
| 07      | 191108 | 190877           | 148381            | 145616        | 146235        | 140016 | 137667            | 137566         | 137345                  | 99.84               | 71.98               |
| 08      | 170400 | 169778           | 133325            | 129521        | 130810        | 123097 | 120704            | 120378         | 119975                  | 99.67               | 70.64               |
| 09      | 177903 | 177494           | 138534            | 135773        | 136545        | 129765 | 124052            | 123820         | 123426                  | 99.68               | 69.60               |
| 10      | 176302 | 176146           | 133088            | 131824        | 132061        | 128694 | 126278            | 125828         | 125784                  | 99.97               | 71.37               |
| 11      | 199758 | 199377           | 153129            | 148751        | 150247        | 140028 | 133902            | 133493         | 133464                  | 99.98               | 66.83               |
| Control | 367    | 350              | 193               | 156           | 170           | 156    | 156               | 156            | -                       | -                   | 42.51               |

**Table S2:** Alpha diversity within the analyzed individual samples from fresco painting and from sampling points of the cave interior and presented at the phylum, family, genus, and ASV level.

| Sample | Description                             | OBS  | Chao1  | SE Chao1 | ACE    | SE ACE | Shannon | Gini-Simpson | Inv Simpson | level  |
|--------|-----------------------------------------|------|--------|----------|--------|--------|---------|--------------|-------------|--------|
| 01     | Depiction of Jesus                      | 689  | 710.2  | 7.9      | 712.5  | 13.2   | 4.7     | 1.0          | 43.6        | ASV    |
| 02     | Entire fresco except depiction of Jesus | 702  | 719.1  | 8.0      | 712.7  | 12.9   | 5.0     | 1.0          | 46.7        |        |
| 03     | Gray discoloration on fresco            | 759  | 778.2  | 7.9      | 776.2  | 13.5   | 5.0     | 1.0          | 39.8        |        |
| 04-05  | Fresco surface damage                   | 790  | 814.6  | 9.6      | 808.1  | 13.8   | 5.3     | 1.0          | 81.0        |        |
| 06     | Iconostasis                             | 254  | 254.3  | 0.7      | 254.7  | 7.8    | 3.4     | 0.9          | 8.2         |        |
| 07     | Blue-green deposits on stone wall       | 1311 | 1380.0 | 16.1     | 1366.6 | 18.0   | 5.2     | 1.0          | 32.3        |        |
| 08     | Green patina on stone wall              | 1757 | 1847.1 | 18.7     | 1822.8 | 20.8   | 5.9     | 1.0          | 85.8        |        |
| 09     | Black deposits on stone wall            | 1522 | 1560.0 | 10.4     | 1556.8 | 19.4   | 5.8     | 1.0          | 95.4        |        |
| 10     | White deposits on stone wall            | 667  | 684.7  | 7.2      | 685.2  | 12.9   | 4.8     | 1.0          | 54.9        |        |
| 11     | Pink deposits on stone wall             | 1744 | 1796.9 | 12.7     | 1793.5 | 20.8   | 6.3     | 1.0          | 212.7       |        |
| 01     | Depiction of Jesus                      | 228  | 242.0  | 8.1      | 239.5  | 7.5    | 3.5     | 0.9          | 12.8        | Genus  |
| 02     | Entire fresco except depiction of Jesus | 217  | 220.4  | 3.0      | 221.9  | 7.0    | 3.5     | 0.9          | 11.7        |        |
| 03     | Gray discoloration on fresco            | 215  | 220.0  | 3.6      | 222.9  | 7.1    | 3.4     | 0.9          | 10.0        |        |
| 04-05  | Fresco surface damage                   | 233  | 239.2  | 4.4      | 240.4  | 7.3    | 3.9     | 1.0          | 21.9        |        |
| 06     | Iconostasis                             | 136  | 138.1  | 2.5      | 137.9  | 5.7    | 2.9     | 0.9          | 7.2         |        |
| 07     | Blue-green deposits on stone wall       | 428  | 442.0  | 6.5      | 444.6  | 10.3   | 4.2     | 1.0          | 24.8        |        |
| 08     | Green patina on stone wall              | 401  | 407.0  | 4.2      | 406.9  | 9.5    | 4.4     | 1.0          | 34.3        |        |
| 09     | Black deposits on stone wall            | 371  | 383.5  | 6.8      | 382.8  | 9.2    | 4.4     | 1.0          | 40.4        |        |
| 10     | White deposits on stone wall            | 249  | 252.3  | 2.6      | 255.5  | 7.7    | 3.6     | 0.9          | 14.4        |        |
| 11     | Pink deposits on stone wall             | 344  | 352.8  | 6.0      | 349.6  | 8.7    | 4.4     | 1.0          | 36.7        |        |
| 01     | Depiction of Jesus                      | 145  | 152.3  | 5.7      | 152.0  | 5.9    | 3.0     | 0.9          | 8.6         | Family |
| 02     | Entire fresco except depiction of Jesus | 137  | 146.2  | 7.4      | 142.6  | 5.4    | 3.1     | 0.9          | 8.0         |        |
| 03     | Gray discoloration on fresco            | 144  | 149.5  | 4.3      | 150.3  | 5.7    | 2.9     | 0.9          | 6.7         |        |
| 04-05  | Fresco surface damage                   | 161  | 169.3  | 6.4      | 167.3  | 6.1    | 3.4     | 0.9          | 12.5        |        |
| 06     | Iconostasis                             | 92   | 92.7   | 1.1      | 93.5   | 4.7    | 2.4     | 0.8          | 5.2         |        |
| 07     | Blue-green deposits on stone wall       | 259  | 280.0  | 10.5     | 277.6  | 8.0    | 3.8     | 1.0          | 20.4        |        |
| 08     | Green patina on stone wall              | 249  | 252.9  | 3.3      | 253.5  | 7.3    | 3.9     | 1.0          | 24.2        |        |
| 09     | Black deposits on stone wall            | 240  | 243.9  | 3.1      | 246.3  | 7.3    | 3.9     | 1.0          | 25.7        |        |
| 10     | White deposits on stone wall            | 168  | 172.4  | 3.6      | 173.9  | 6.4    | 3.2     | 0.9          | 10.6        |        |
| 11     | Pink deposits on stone wall             | 219  | 220.2  | 1.5      | 221.5  | 6.5    | 3.9     | 1.0          | 27.0        |        |

|       |                                         |    |      |     |      |     |     |     |     |        |
|-------|-----------------------------------------|----|------|-----|------|-----|-----|-----|-----|--------|
| 01    | Depiction of Jesus                      | 19 | 19.0 | 0.2 | 20.3 | 1.9 | 1.4 | 0.7 | 2.9 |        |
| 02    | Entire fresco except depiction of Jesus | 19 | 22.0 | 4.6 | 22.1 | 2.0 | 1.5 | 0.7 | 3.1 |        |
| 03    | Gray discoloration on fresco            | 18 | 18.0 | 0.5 | 19.1 | 1.4 | 1.4 | 0.7 | 2.9 |        |
| 04-05 | Fresco surface damage                   | 20 | 21.0 | 2.3 | 24.1 | 1.7 | 1.7 | 0.7 | 3.9 |        |
| 06    | Iconostasis                             | 17 | 17.0 | 0.0 | 17.0 | 1.9 | 1.2 | 0.6 | 2.6 |        |
| 07    | Blue-green deposits on stone wall       | 30 | 30.0 | 0.2 | 30.3 | 2.6 | 1.8 | 0.8 | 4.2 | Phylum |
| 08    | Green patina on stone wall              | 28 | 28.0 | 0.2 | 28.5 | 2.3 | 2.0 | 0.8 | 5.7 |        |
| 09    | Black deposits on stone wall            | 27 | 27.0 | 0.2 | 27.6 | 2.3 | 1.7 | 0.7 | 3.5 |        |
| 10    | White deposits on stone wall            | 24 | 24.3 | 0.9 | 25.4 | 1.9 | 1.3 | 0.6 | 2.6 |        |
| 11    | Pink deposits on stone wall             | 26 | 26.0 | 0.0 | 26.0 | 2.0 | 2.0 | 0.8 | 5.6 |        |

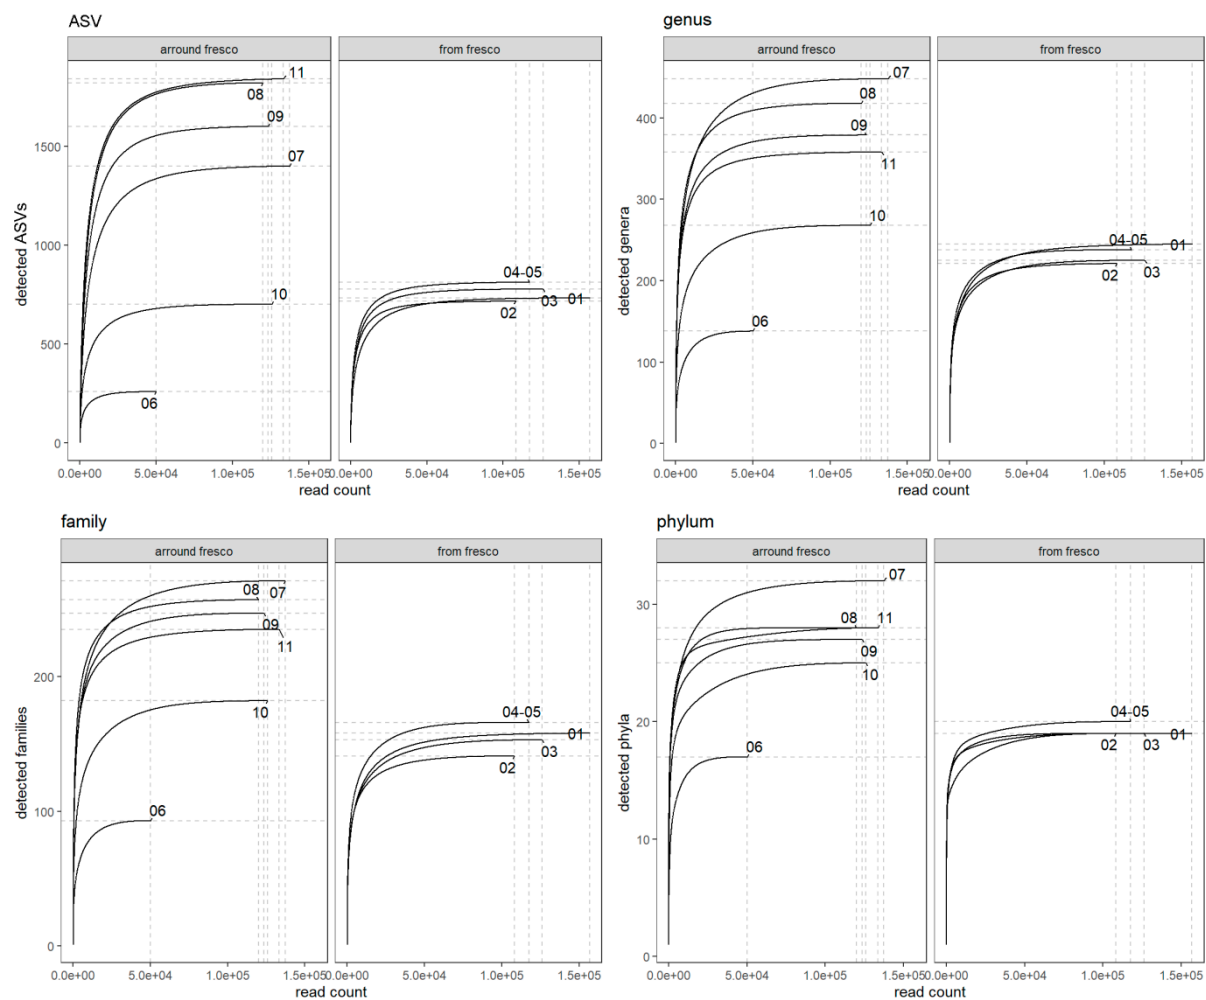

**Figure S1:** Rarefaction analysis at the ASV, genus, family and phylum levels.

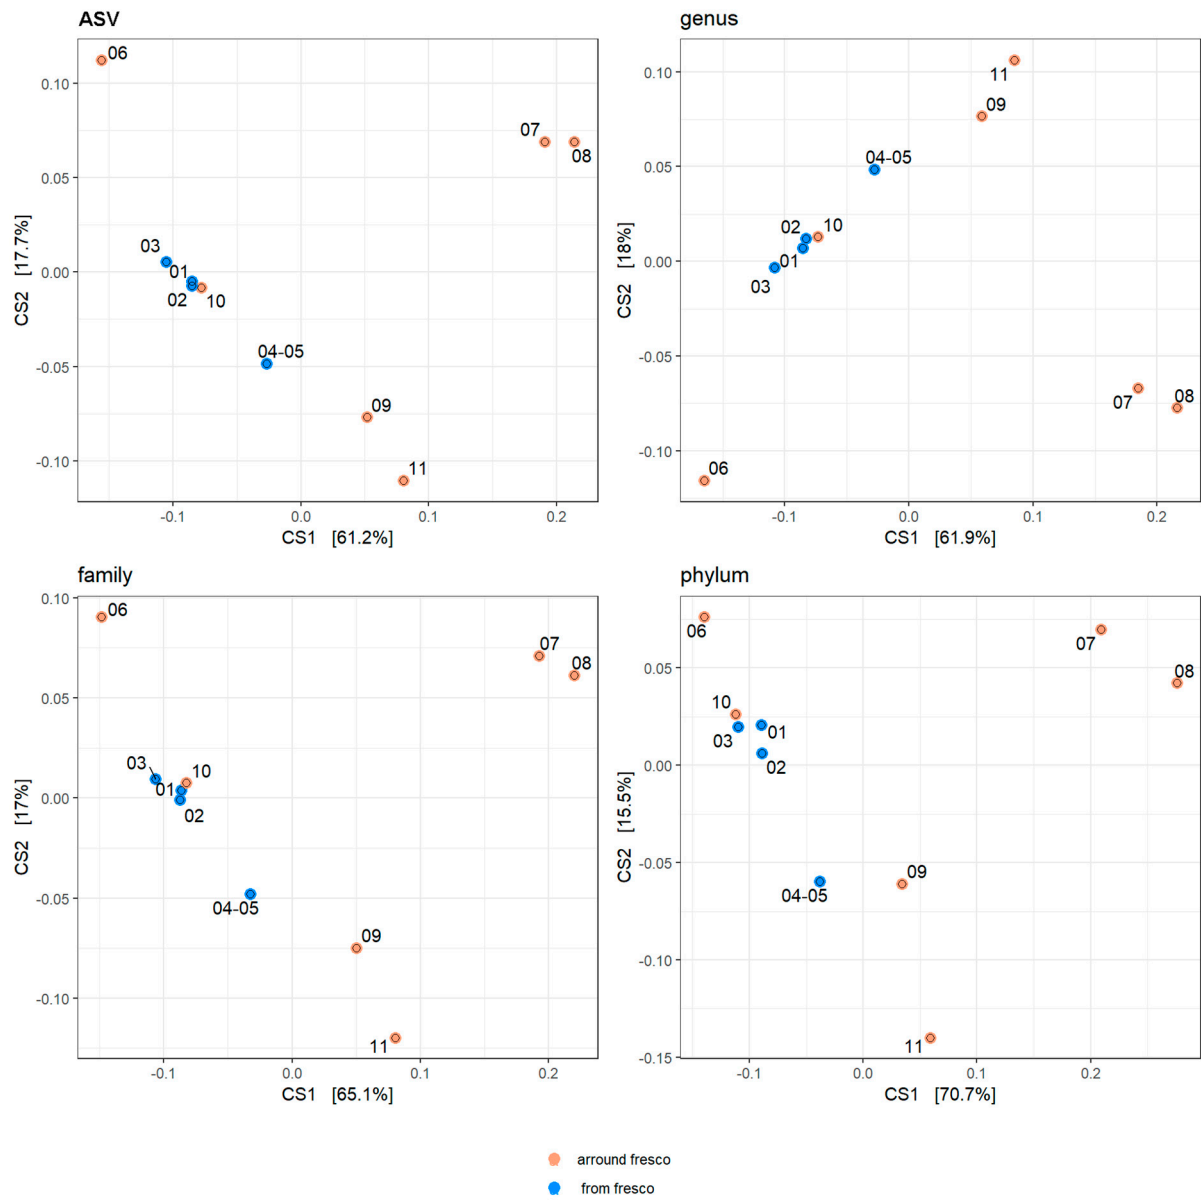

**Figure S2:** The DPCoA plot created with Bray-Curtis dissimilarities at the ASV, genus, family, and phylum taxa levels, to present the variability within and between groups of samples.
